# Supplementary material for: Technical Note: Evaluation of a low-cost evaporation protection method for portable water samplers
Source: Copernicus journal article supplement (doi:10.5194/hess-2020-341), 2020-07-14
Supplement: Supplementary file 1 [file hess-2020-341-supplement.zip]

Archive with 6 entries (6 files):
- Exp1_climatedata.txt
- Exp1_isotopes.txt
- Exp2_climatedata.txt
- Exp2_isotopes.txt
- Exp3.txt
- Supplement.pdf
